# Supplementary material for: Non-Ionic Osmotic Stress Induces the Biosynthesis of Nodulation Factors and Affects Other Symbiotic Traits in Sinorhizobium fredii HH103
Source: MDPI journal article supplement (doi:10.3390/biology12020148), 2023-01-18
Supplement: s1 [file s1]

# Non-Ionic Osmotic Stress Induces the Biosynthesis of Nodulation Factors and Affects Other Symbiotic Traits in *Sinorhizobium fredii* HH103

Francisco Fuentes-Romero<sup>1</sup>, Isamar Moyano-Bravo<sup>1</sup>, Paula Ayala-García<sup>1</sup>, Miguel Ángel Rodríguez-Carvajal<sup>2</sup>, Francisco Pérez-Montaña<sup>1</sup>, Sebastián Acosta-Jurado<sup>3</sup>, Francisco Javier Ollero<sup>1</sup>, José María Vinardell<sup>1,\*</sup>

## List of Supplementary Material

**Figure S1.**  $\beta$ -galactosidase activity of *S. fredii* HH103 carrying plasmid pMP240 upon growth in YM supplemented with different mannitol concentration (from 55 mM to 1 M).

**Figure S2.** Growth curves of *S. fredii* HH103 in different media supplemented or not with 400 mM mannitol. (A) TY medium; (B) YM medium; (C) Minimal medium (MM); (D) Bromfield medium (BF).

**Figure S3.** LPS (A) and KPS (B) electrophoretic profiles of *S. fredii* HH103 grown in TY medium in the absence or presence of 400 mM mannitol.

**Table S1.** Fold-changes, as determined by RNAseq, of the *S. fredii* HH103 *nodABC* genes after 16-h growth in the presence of 400 mM mannitol.

**Supplementary Dataset S1.** Complete list of Nod factors produced by *Sinorhizobium fredii* HH103 in YM medium in the absence (HH-) or the presence of 3.7  $\mu$ M genistein (HH+) or 400 mM mannitol (HH mannitol).

**Supplementary Dataset S2.** *S. fredii* HH103 DEGs upon growth in 400 mM mannitol ordered by fold-change.

**Supplementary Dataset S3.** List of *S. fredii* HH103 induced genes in the presence of 400 mM mannitol, ordered by replicon.

**Supplementary Dataset S4.** List of the different AHLs detected as produced by *S. fredii* HH103 grown in the absence (269) or presence (269\_Manitol) of 400 mM mannitol.

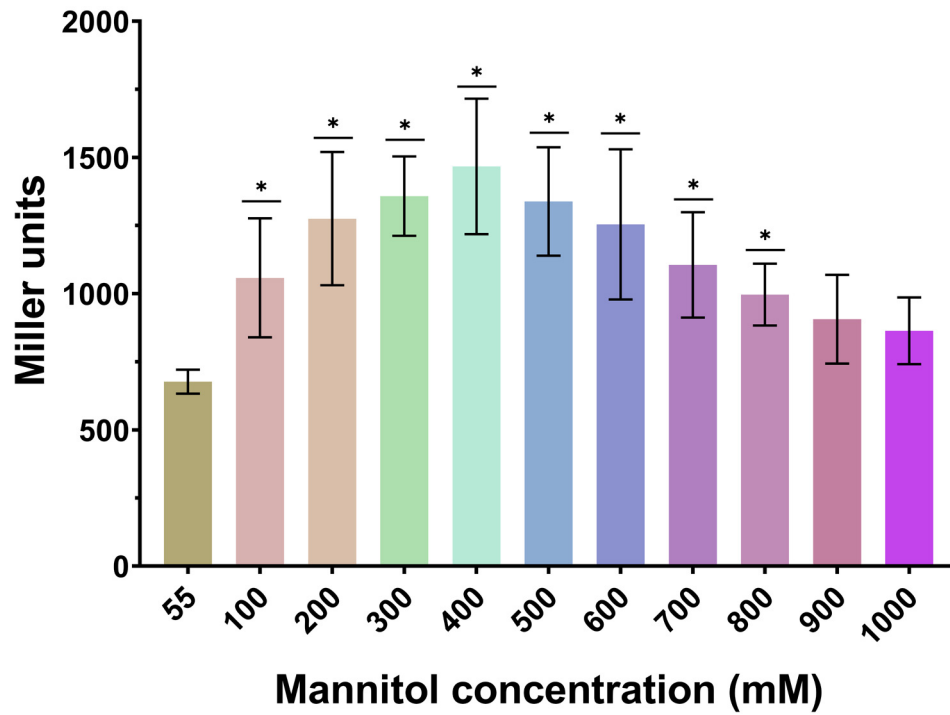

**Figure S1.**  $\beta$ -galactosidase activity of *S. fredii* HH103 carrying plasmid pMP240 upon growth in YM supplemented with different mannitol concentration (from 55 mM to 1 M). Asterisks (\*) indicate significant differences with the corresponding control sample using the non-parametric test of Mann–Whitney,  $\alpha = 5\%$ .

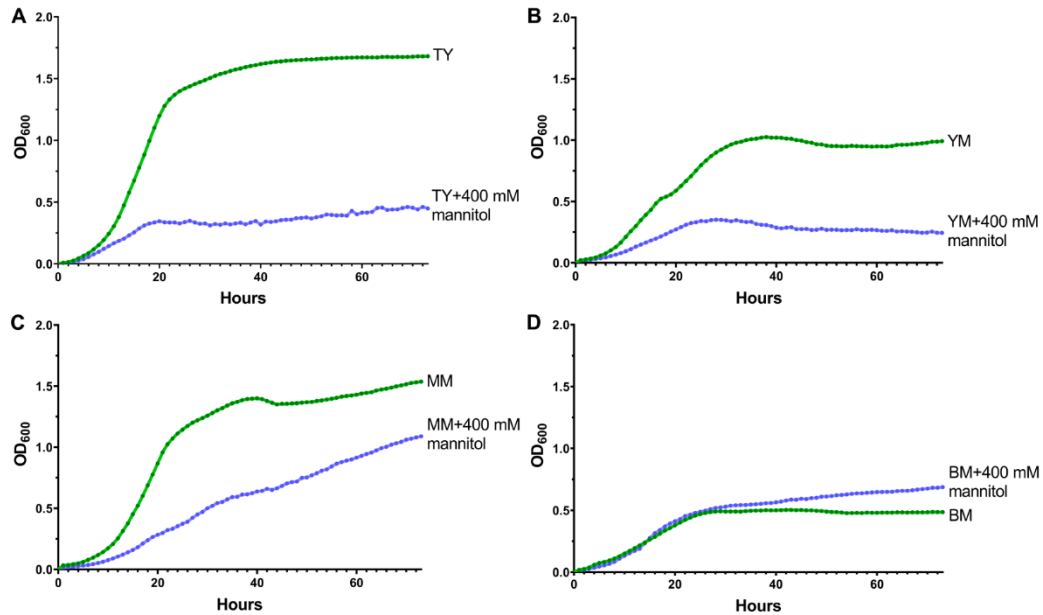

**Figure S2.** Growth curves of *S. fredii* HH103 in different media supplemented or not with 400 mM mannitol. (A) TY medium; (B) YM medium; (C) Minimal medium (MM); (D) Bromfield medium (BF).

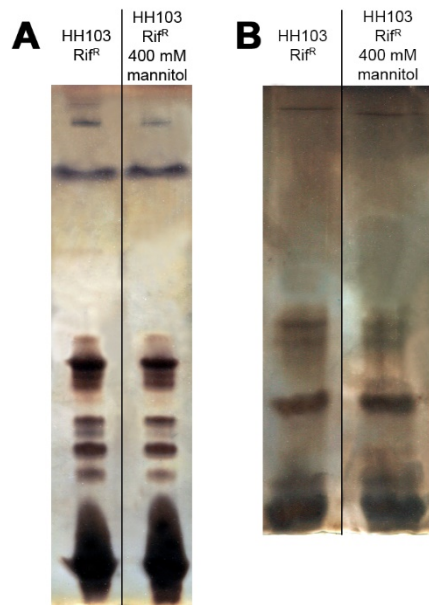

**Figure S3.** LPS (**A**) and KPS (**B**) electrophoretic profiles of *S. fredii* HH103 grown in TY medium in the absence or presence of 400 mM mannitol.

**Table S1.** Fold-changes, as determined by RNAseq, of the *S. fredii* HH103 *nodABC* genes after 16-h growth in the presence of 400 mM mannitol.

| Gene_name   | GENEID        | log2BaseMean | log2Ratio  | STDERR_log2Ratio | pvalue     | padjust    | FoldChange |
|-------------|---------------|--------------|------------|------------------|------------|------------|------------|
| <i>nodA</i> | psfHH103d_126 | 9.408819572  | 1.0628198  | 0.615502891      | 0.08421252 | 0.20073394 | 2.08901058 |
| <i>nodB</i> | psfHH103d_127 | 9.451582027  | 0.90654382 | 0.442138801      | 0.04032929 | 0.11817993 | 1.87454936 |
| <i>nodC</i> | psfHH103d_128 | 9.235802154  | 1.4530014  | 0.448751746      | 0.00120424 | 0.00866408 | 2.73777029 |
